# Supplementary material for: Z-type and R-type macro-RAFT agents in RAFT dispersion polymerization – another mechanism perspective on PISA
Source: Royal Society of Chemistry journal article supplement (doi:10.1039/c6py00605a), 2016-01-01
Supplement: c6py00605a1.pdf [file c6py00605a1.pdf]

## Supplementary information

# Z-type and R-type macro-RAFT agent in RAFT dispersion polymerization - another mechanism perspective for PISA

Mingguang Yu<sup>a</sup>, Jianbo Tan<sup>b</sup>, Jianwen Yang<sup>a</sup>, Zhaohua Zeng<sup>\*a</sup>

<sup>a</sup> Key Laboratory for Polymeric Composite and Functional Materials of Ministry of Education, and Key Laboratory of Designed Synthesis and Application of Polymer Material, School of Chemistry and Chemical Engineering, Sun Yat-Sen University, Guangzhou 510275, China. E-mail: [ceszzh@mail.sysu.edu.cn](mailto:ceszzh@mail.sysu.edu.cn)

<sup>b</sup> Department of Polymeric Materials and Engineering, School of Materials and Energy, Guangdong University of Technology Guangzhou 510006, China

### 1. Synthesis of mPEG<sub>113</sub>-DDMAT Macro-RAFT Agent

The mPEG<sub>113</sub>-DDMAT macro-RAFT agent was synthesized according to the reported procedures with some modification. For the mPEG<sub>113</sub>-DDMAT macro-RAFT agent, the mPEG<sub>113</sub>-OH (10.0 g, 2 mmol), DDMAT (1.45 g, 4 mmol), DMAP (0.05 g, 0.4 mmol) were dissolved in 120 mL dry DCM in a dry flask. After the reaction mixture was cooling to 0 °C in an ice-water bath, the DCC (0.83 g, 4.0 mmol) diluted in dry DCM (30 mL) was added dropwise over 30 min, and still proceed in the ice-water bath for about 1h. After the reaction proceeded under stirring at 25 °C for 48 h, the reaction mixture was filtered to remove insoluble salts, concentrated, and precipitated into cold mixture of n-hexane and diethyl ether (v/v = 1:1) to yield a yellowish powder. In order to increase the grafting rate of hydroxyl-terminated mPEG and ensure it complete esterification, 2-fold excess of RAFT agents (DDMAT or BTPA) were added. And then the product was purified by silica column chromatography, using chloroform and methanol (v/v = 95:5) as mobile phase, to removed the excess of small molecule RAFT agents and N,N'-dicyclohexylcarbodiimide (DCC).

### 2 RAFT dispersion polymerization of styrene with mPEG<sub>113</sub>-DDMAT macro-RAFT agent in methanol–water mixture

RAFT dispersion polymerization of St was performed in methanol-water (80/20, w/w) at 70 °C. The total solid was controlled at 15%, and the molar ratio of [St]:[mPEG<sub>113</sub>-TTC]:[AIBN] was 1200:3:1. In a typical experiment, St (1.25 g, 12 mmol), mPEG<sub>113</sub>-DDMAT (0.16 g, 0.03 mmol), and AIBN (1.64 mg, 0.01 mmol) were dissolved in the methanol-water mixture (80/20, w/w, 8.0 g). The reaction mixture was purged with nitrogen for 30 min, sealed, and then immersed into a preheated oil bath at 70 °C. For kinetic studies, aliquots were taken under N<sub>2</sub> at different time intervals for analysis by <sup>1</sup>H NMR and GPC characterizations.

### 3 RAFT solution polymerization of styrene with mPEG<sub>113</sub>-DDMAT macro-RAFT agent

Synthesis of mPEG<sub>113</sub>-PSt diblock copolymer was via RAFT solution polymerization at 1200:3:1 molar ratios of [St]:[mPEG<sub>113</sub>-TTC]:[AIBN] in 1,4-dioxane at 70 °C. In a typical experiment, St (2.50 g, 24 mmol), mPEG<sub>113</sub>-DDMAT (0.32 g, 0.06 mmol), and AIBN (3.28 mg, 0.02 mmol) were dissolved in 1,4-dioxane (2.82 g). The reaction mixture was purged with nitrogen for 30 min, sealed, and then immersed into a preheated oil bath at 70 °C. For kinetic studies, aliquots were taken under N<sub>2</sub> at different time intervals for analysis by <sup>1</sup>H NMR and GPC characterizations.

### 4 Synthesis of PHEA<sub>36</sub>-BTPA and PDMA<sub>60</sub>-BTPA macro-RAFT agents

The PHEA-BTPA macro-RAFT agent was synthesized by RAFT solution polymerization in 1,4-dioxane at [HEA]:[BTPA]:[AIBN]=45:1:0.1. The monomer conversion of HEA was quenched at 79.6% after 2 h polymerization. The theoretical molecular weight ( $M_{n,th}$ ) of PHEA-BTPA is 4.46Kg/mol, labeled as PHEA<sub>36</sub>-BTPA, in which the polymerization degree (DP) of 36 is calculated according to eq (1) based on theoretical molecular weight ( $M_{n,th}$ ). The GPC molecular weight  $M_{n,GPC}$  of PHEA<sub>36</sub>-BTPA analyzed by THF-based GPC is 2.18Kg/mol with  $M_w/M_n$  value of 1.07 (Fig. S4). The obtained  $M_{n,GPC}$  value is obviously lower than  $M_{n,th}$ , which is possibly due to the polar differences between non-polar polystyrene standard and the polar PHEA-TTC<sup>1</sup>.

The PDMA-BTPA macro-RAFT agent was synthesized by RAFT solution polymerization in 1,4-dioxane at [DMA]:[BTPA]:[AIBN]=60:1:0.1. The monomer conversion of DMA was quenched at about 100% after 2 h polymerization. The theoretical molecular weight ( $M_{n,th}$ ) of PDMA-BTPA is 6.22Kg/mol, labeled as PDMA<sub>60</sub>-BTPA. The molecular weight  $M_{n,GPC}$  of PDMA<sub>60</sub>-BTPA analyzed by THF-based GPC is 2.60Kg/mol with  $M_w/M_n$  value of 1.11 (Fig. 4B). Similarly, the obtained  $M_{n,GPC}$  value is obviously lower than  $M_{n,th}$ .

$$M_{n,th} = \frac{[\text{monomer}]_0 \times M_{\text{monomer}}}{[\text{RAFT}]_0} \times \text{conversion} + M_{\text{RAFT}} \quad (1)$$

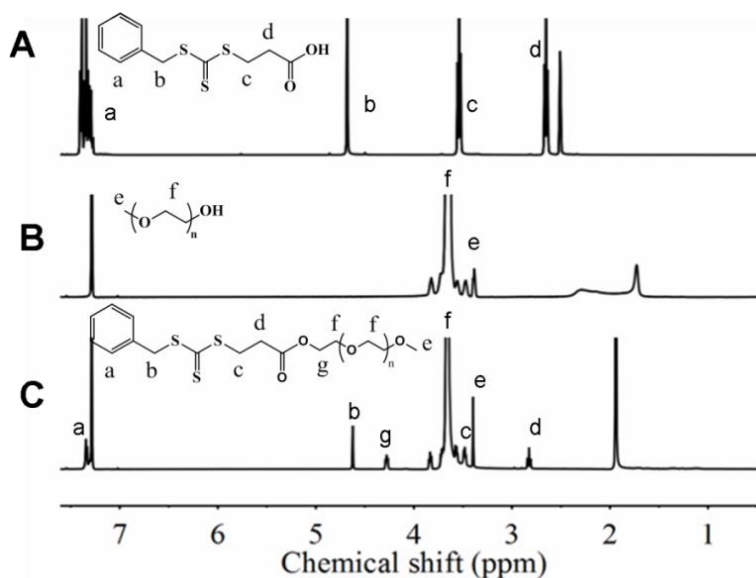

Fig.S1 <sup>1</sup>H NMR spectra of BTPA (A) in D<sub>6</sub>-DMSO, mPEG<sub>113</sub>-OH (B), and mPEG<sub>113</sub>-BTPA (C) in CDCl<sub>3</sub>.

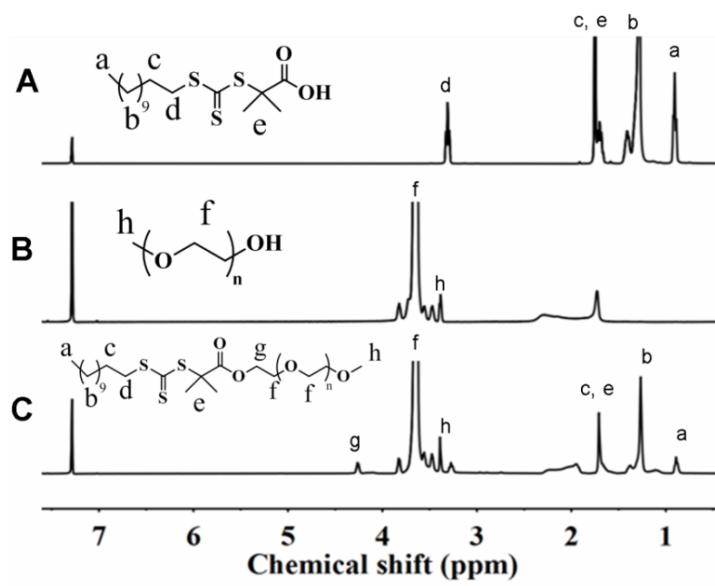

Fig.S2  $^1\text{H}$  NMR spectra of DDMAT (A), mPEG<sub>113</sub>-OH (B), and mPEG<sub>113</sub>-DDMAT(C) in  $\text{CDCl}_3$ .

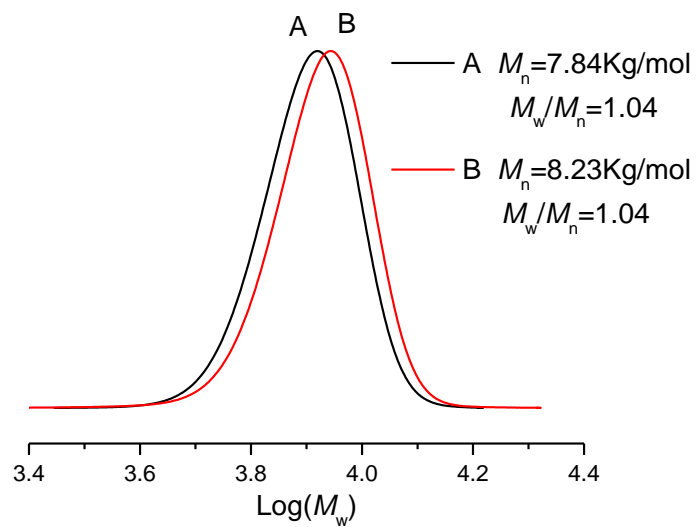

Fig. S3 GPC traces of mPEG<sub>113</sub>-DDMAT (A) and mPEG<sub>113</sub>-BTPA (B).

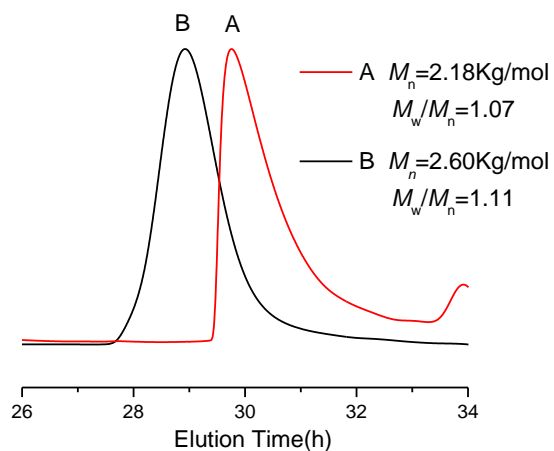

Fig. S4 GPC traces of PHEA<sub>36</sub>-BTPA (A) and PDMA<sub>60</sub>-BTPA (B).

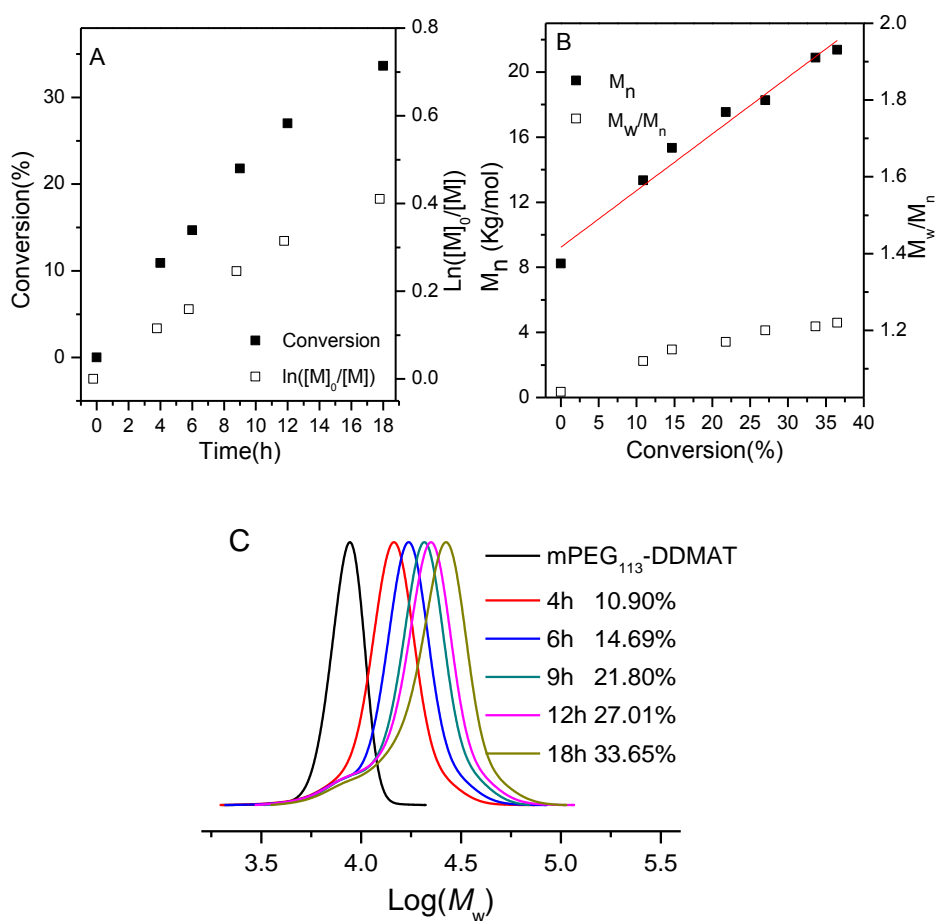

Fig. S5 RAFT solution polymerization of St using mPEG<sub>113</sub>-DDMAT macro-RAFT agent at 70°C, [St]<sub>0</sub>:[macro-RAFT]<sub>0</sub>:[AIBN]<sub>0</sub>=1200:3:1, solids content=50%, 1,4-dioxane. (A) polymerization kinetics plot, (B) molecular weight and dispersity of mPEG<sub>113</sub>-b-PSt diblock copolymer vs monomer conversion, and (C) evolution of GPC traces of mPEG<sub>113</sub>-b-PS diblock copolymer vs monomer conversion.

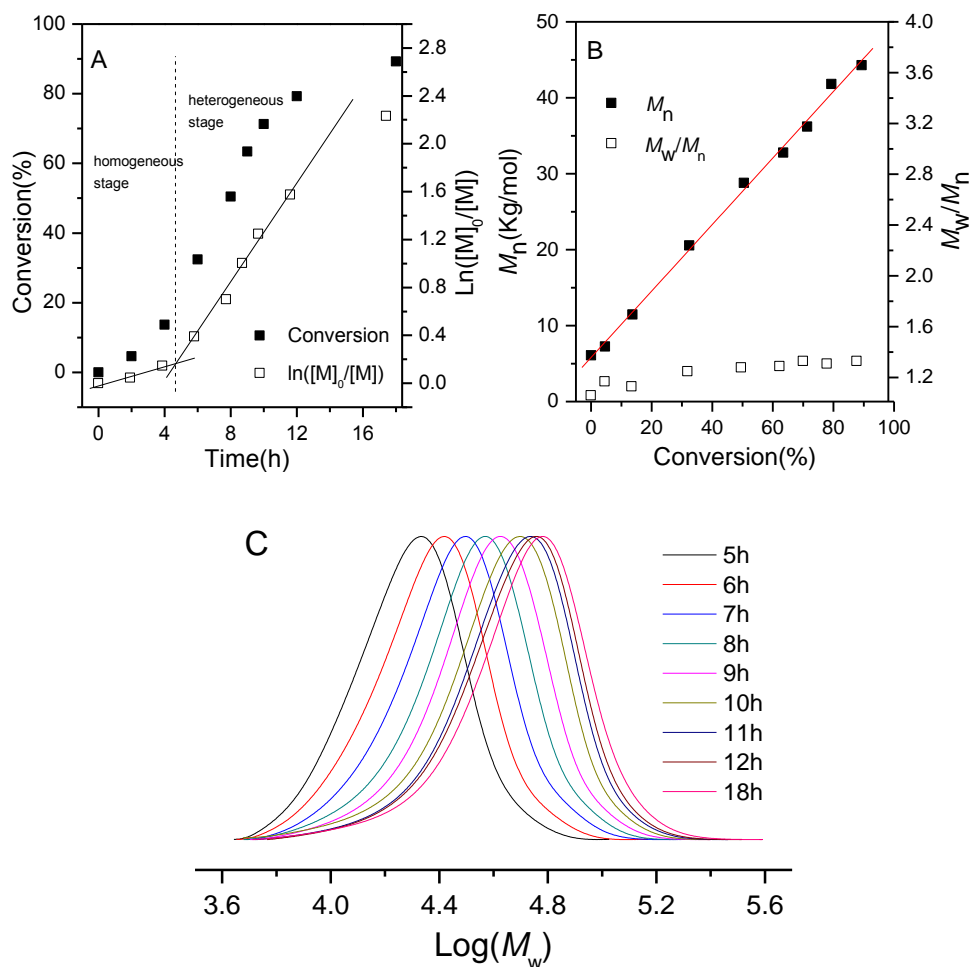

Fig. S6 RAFT dispersion polymerization of St using PDMA<sub>60</sub>-BTPA macro-RAFT agent at 70°C, [St]<sub>0</sub>:[macro-RAFT]<sub>0</sub>:[AIBN]<sub>0</sub>=1200:3:1, solids content=15%, methanol-water mixture (80/20, w/w). (A) polymerization kinetics plot, (BB) molecular weight and dispersity of PDMA<sub>60</sub>-*b*-PSt diblock copolymer vs monomer conversion, and (C) evolution of GPC traces of PDMA<sub>60</sub>-*b*-PSt diblock copolymer vs monomer conversion.

### Notes and references

- 1 A. P. Narrainen, A. Pascual and D. M. Haddleton, J. Polym. Sci., Part A: Polym. Chem., 2002, 40, 439–450.
